# Supplementary material
Source: HighWire-hosted journal article supplement (https://bmjopen.bmj.com/content/12/6/e060091)
Supplement: inline-supplementary-material-1 [file inline-supplementary-material-1.pdf]

**Supplement Table 1: Baseline characteristics of participants: AMCHS**

| <b>Variable</b>                   | Female (n = 2042)<br>N (%) | Male (n = 2042)<br>N (%) |
|-----------------------------------|----------------------------|--------------------------|
| <b>Age (years)</b>                |                            |                          |
| <30, n(%)                         | 923(45.2)                  | 724 (35.5)               |
| 30-40, n (%)                      | 1029(50.4)                 | 1139(55.8)               |
| >40, n(%)                         | 85(4.2)                    | 174(8.5)                 |
| Missing data                      | 5(0.2)                     | 5(0.2)                   |
| <b>District</b>                   |                            |                          |
| City (urban)                      | 1559(76.5)                 |                          |
| County (suburban)                 | 288(14.1)                  |                          |
| Countryside (rural)               | 191(9.4)                   |                          |
| <b>Educational level</b>          |                            |                          |
| Postgraduate                      | 135(6.6)                   | 183(9.0)                 |
| College/university                | 1108(54.2)                 | 1145(56.1)               |
| Secondary                         | 401(19.6)                  | 327(16.0)                |
| Under secondary                   | 25(1.2)                    | 16(0.8)                  |
| <b>Family annual income (RMB)</b> |                            |                          |
| <50 thousands                     | 328(16.1)                  |                          |
| 50 ~ 100 thousands                | 760(37.2)                  |                          |
| 100 ~ 200 thousands               | 675(33.1)                  |                          |
| 200 ~ 300 thousands               | 167(8.2)                   |                          |
| >300 thousands                    | 104(5.1)                   |                          |
| Missing data                      | 1(0.0)                     |                          |
| <b>Occupation</b>                 |                            |                          |
| Officers                          | 541(26.5)                  | 520(25.5)                |
| Technician                        | 227(11.1)                  | 461(22.6)                |
| Clerk                             | 163(8.0)                   | 71(3.5)                  |

|                                                                                   |             |            |
|-----------------------------------------------------------------------------------|-------------|------------|
| Business and service personnel                                                    | 589(28.9)   | 535(26.2)  |
| Agriculture, forestry, animal husbandry, fishery and water conservation personnel | 15(0.7)     | 41(2.0)    |
| Production and shipping equipment operators and related personnel                 | 76(3.7)     | 191(9.4)   |
| Solider                                                                           | 0(0.0)      | 11(0.5)    |
| Other practitioners that are inconvenient to be classified                        | 67(3.3)     | 3(0.1)     |
| unemployed                                                                        | 361(17.7)   | 148(7.2)   |
| Missing data                                                                      | 2(0.1)      | 2(0.1)     |
| <b>Smoking and drinking before pregnancy</b>                                      |             |            |
| Active smoking (ever or current)                                                  | 104(5.1)    | 1091(54.3) |
| Passive smoking                                                                   | 1249(61.5)  | 1669(83.0) |
| Alcohol drinking                                                                  | 687(33.8)   | 1265(63.0) |
| <b>Body mass index (BMI) before pregnancy (kg/m<sup>2</sup>)</b>                  |             |            |
| Mean (SD)                                                                         | 22.45(3.13) | 24.5(3.3)  |
| Low (<18.5)                                                                       | 130(6.4)    | 41(2.0)    |
| Normal (18.5 -<23.9)                                                              | 1173(57.4)  | 792(38.8)  |
| High (≥23.9)                                                                      | 548(26.8)   | 728(35.7)  |
| Missing data                                                                      | 191(9.4)    | 279(13.7)  |
| <b>Anxiety</b>                                                                    | 124(6.1)    | 92(4.6)    |
| <b>Depression</b>                                                                 | 747(36.7)   | 561(27.9)  |
| <b>Sleeping quality</b>                                                           |             |            |
| Bad                                                                               | 0(0.0)      | 2(0.1)     |
| Not bad                                                                           | 25(1.2)     | 12(0.6)    |
| Normal                                                                            | 547(26.9)   | 462(23.0)  |
| Good                                                                              | 1461(71.9)  | 1532(76.3) |

|                                                      |            |        |
|------------------------------------------------------|------------|--------|
| Missing data                                         | 1(0.0)     | 1(0.0) |
| <b>Primary infertility diagnosis, n (%) (n=1866)</b> |            |        |
| Male factor                                          | 631(33.8)  |        |
| Female factor                                        | 1568(84.0) |        |
| Ovulation disorders                                  | 267(17.3)  |        |
| Uterine disorders                                    | 165(10.5)  |        |
| Endometriosis                                        | 8(0.5)     |        |
| Tubal factor                                         | 1059(67.5) |        |
| Unexplained                                          | 33(2.1)    |        |
| Missing data                                         | 36(2.3)    |        |
| <b>Gravidity (n=2033)</b>                            |            |        |
| 0                                                    | 1029(50.6) |        |
| ≥1                                                   | 1004(49.4) |        |
| <b>Parity (n=2033)</b>                               |            |        |
| 0                                                    | 1742(85.7) |        |
| ≥1                                                   | 291(14.3)  |        |
| <b>History of previous pregnancy (n=291)</b>         |            |        |
| Gestational Diabetes Mellitus                        | 17(5.8)    |        |
| Hypertension                                         | 6(2.1)     |        |
| Caesarean section                                    | 137(47.1)  |        |
| Adverse pregnancy history(n=1004)                    | 446(44.4)  |        |
| Artificial abortion(n=1004)                          | 639(63.6)  |        |
| <b>Sexual abstinence (n=1815)</b>                    |            |        |
| Mean (SD)                                            | 4.8(2.6)   |        |
| Normal (2-7)                                         | 1740(95.9) |        |
| Abnormal (< 2 or > 7)                                | 75(4.1)    |        |
| <b>Sperm Volume (ml) (n=1822)</b>                    |            |        |
| Mean (SD)                                            | 3.7(1.9)   |        |
| Normal (1.5-6)                                       | 1600(87.8) |        |

|                                                                           |            |
|---------------------------------------------------------------------------|------------|
| Abnormal (< 1.5 or > 6)                                                   | 222(12.2)  |
| <b>Sperm Concentration(ml×106) (N=1789)</b>                               |            |
| Mean (SD)                                                                 | 72.5(73.2) |
| Normal (≥15)                                                              | 1485 (83)  |
| Oligozoospermic (< 15 and > 0)                                            | 226(12.6)  |
| Azoospermia (=0)                                                          | 78(4.3)    |
| <b>Sperm Progressive motility (rapid + slow progression) (%) (n=1754)</b> |            |
| Mean (SD)                                                                 | 37.8(19.8) |
| Normal (≥32)                                                              | 1093(62.3) |
| Abnormal (< 32)                                                           | 661(37.7)  |
| <b>Sperm Morphology (%) (n=1453)</b>                                      |            |
| Mean (SD)                                                                 | 5.0(6.0)   |
| normal (≥4)                                                               | 1037(71.4) |
| abnormal (<4)                                                             | 416(28.6)  |
